# Supplementary material for: Tibolone Pre-Treatment Ameliorates the Dysregulation of Protein Translation and Transport Generated by Palmitic Acid-Induced Lipotoxicity in Human Astrocytes: A Label-Free MS-Based Proteomics and Network Analysis
Source: MDPI journal article supplement (doi:10.3390/ijms23126454), 2022-06-09
Supplement: s1 [file s1]

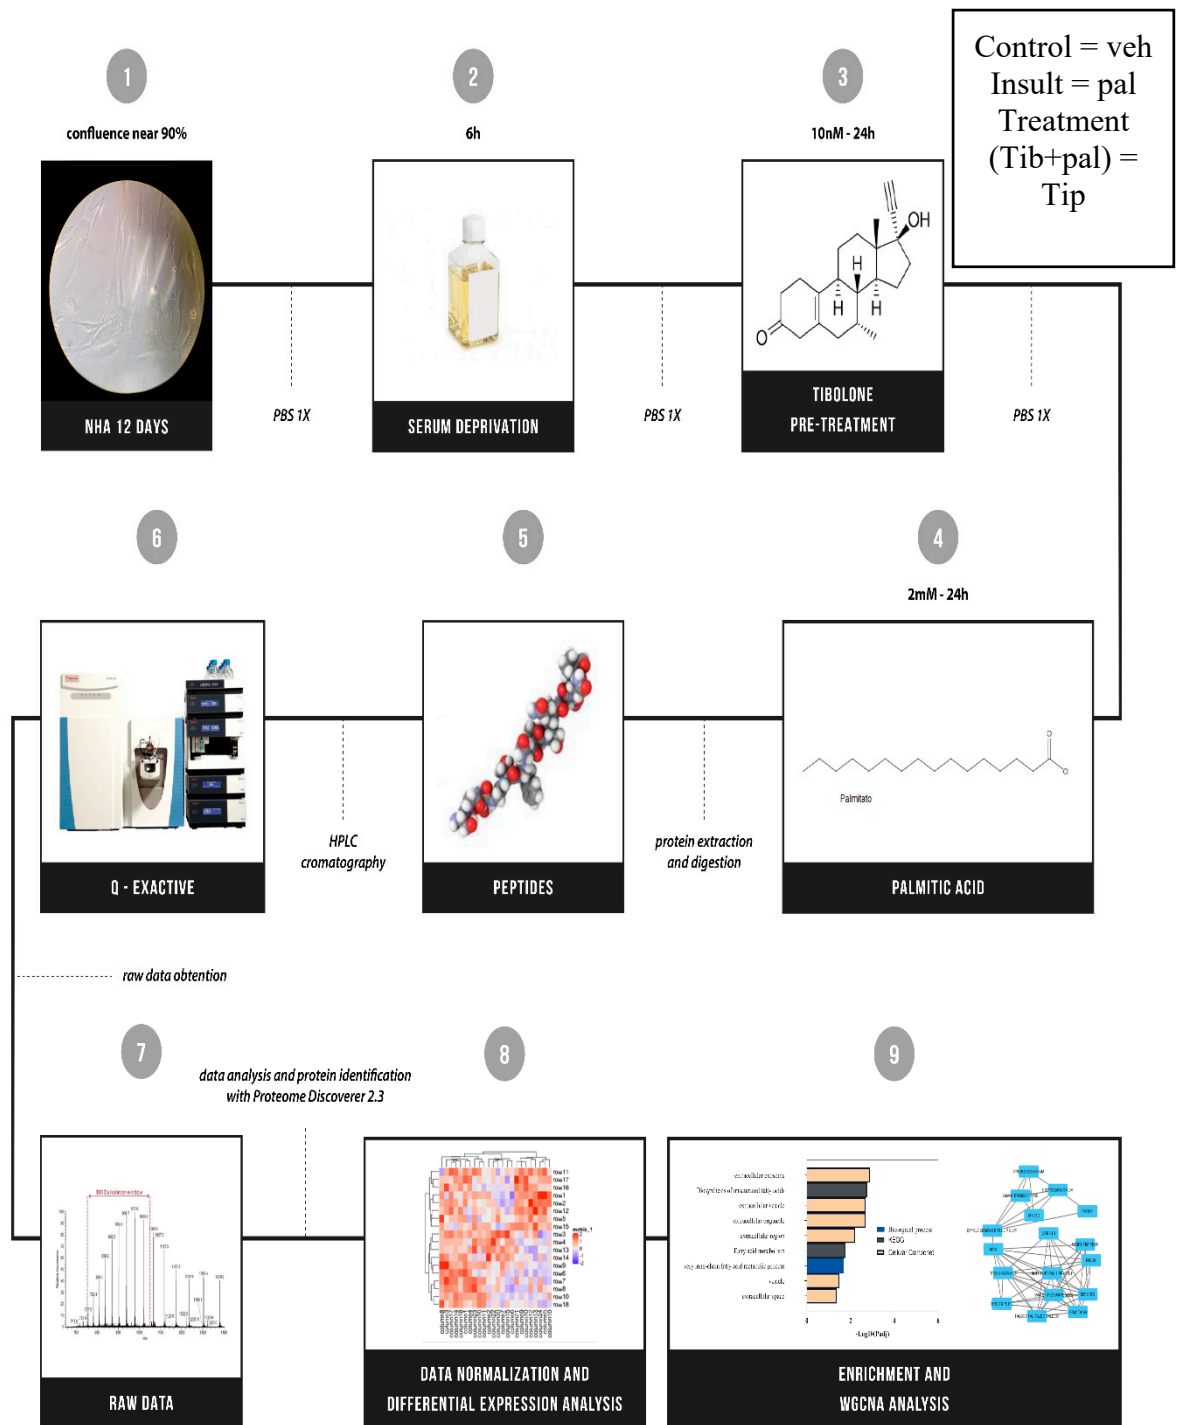

**Figure S1.** Graphic summary of the methodology used in the study. Normal human astrocytes (NHA) were cultured in ABM until 80% confluency (1), serum-deprived for 6 h (2), and submitted or not to tibolone pre-treatment (3) and palmitic acid (4). Then, sample proteins were extracted, digested (5), and LC-MS/MS-analyzed (6). The obtained raw data (7) were normalized and analyzed (8), and enrichment and WGCNA analyses were performed (9).

**Table S1.** Full list of differentially expressed proteins in the comparison between pal vs. veh,  $p < 0.01$  and FDR  $< 0.1$ .

| Entry  | Protein names                                                                                                                                                                                                                                                                                            | Gene names                                 | Protein expression |
|--------|----------------------------------------------------------------------------------------------------------------------------------------------------------------------------------------------------------------------------------------------------------------------------------------------------------|--------------------------------------------|--------------------|
| P31949 | Protein S100-A11 (Calgizzarin) (Metastatic lymph node gene 70 protein) (MLN 70) (Protein S100-C) (S100 calcium-binding protein A11) [Cleaved into: Protein S100-A11, N-terminally processed]                                                                                                             | S100A11<br>MLN70 S100C                     | Up-regulated       |
| Q9P2R7 | Succinate--CoA ligase [ADP-forming] subunit beta, mitochondrial (EC 6.2.1.5) (ATP-specific succinyl-CoA synthetase subunit beta) (A-SCS) (Succinyl-CoA synthetase beta-A chain) (SCS-betaA)                                                                                                              | SUCLA2                                     | Up-regulated       |
| Q12904 | Aminoacyl tRNA synthase complex-interacting multifunctional protein 1 (Multisynthase complex auxiliary component p43) [Cleaved into: Endothelial monocyte-activating polypeptide 2 (EMAP-2) (Endothelial monocyte-activating polypeptide II) (EMAP-II) (Small inducible cytokine subfamily E member 1)]  | AIMP1 EMAP2<br>SCYE1                       | Up-regulated       |
| Q9Y265 | RuvB-like 1 (EC 3.6.4.12) (49 kDa TATA box-binding protein-interacting protein) (49 kDa TBP-interacting protein) (54 kDa erythrocyte cytosolic protein) (ECP-54) (INO80 complex subunit H) (Nuclear matrix protein 238) (NMP 238) (Pontin 52) (TIP49a) (TIP60-associated protein 54-alpha) (TAP54-alpha) | RUVBL1<br>INO80H<br>NMP238 TIP49<br>TIP49A | Up-regulated       |
| P61204 | ADP-ribosylation factor 3                                                                                                                                                                                                                                                                                | ARF3                                       | Up-regulated       |
| P60484 | Phosphatidylinositol 3,4,5-trisphosphate 3-phosphatase and dual-specificity protein phosphatase PTEN (EC 3.1.3.16) (EC 3.1.3.48) (EC 3.1.3.67) (Mutated in multiple advanced cancers 1) (Phosphatase and tensin homolog)                                                                                 | PTEN MMAC1<br>TEP1                         | Up-regulated       |
| Q8NGA1 | Olfactory receptor 1M1 (Olfactory receptor 19-6) (OR19-6) (Olfactory receptor OR19-5)                                                                                                                                                                                                                    | OR1M1                                      | Up-regulated       |
| P81605 | Dermcidin (EC 3.4.-.-) (Preproteolysin) [Cleaved into: Survival-promoting peptide; DCD-1]                                                                                                                                                                                                                | DCD AIDD<br>DSEP                           | Up-regulated       |
| P13473 | Lysosome-associated membrane glycoprotein 2 (LAMP-2) (Lysosome-associated membrane protein 2) (CD107 antigen-like family member B) (LGP-96) (CD antigen CD107b)                                                                                                                                          | LAMP2                                      | Up-regulated       |
| P00403 | Cytochrome c oxidase subunit 2 (EC 7.1.1.9) (Cytochrome c oxidase polypeptide II)                                                                                                                                                                                                                        | MT-CO2 COII<br>COX2 COXII<br>MTCO2         | Up-regulated       |
| Q9BW60 | Elongation of very long chain fatty acids protein 1 (EC 2.3.1.199) (3-keto acyl-CoA synthase ELOVL1) (ELOVL fatty acid elongase 1) (ELOVL FA elongase 1) (Very long chain 3-ketoacyl-CoA synthase 1) (Very long chain 3-oxoacyl-CoA synthase 1)                                                          | ELOVL1 SSC1<br>CGI-88                      | Up-regulated       |
| Q9UBI6 | Guanine nucleotide-binding protein G(I)/G(S)/G(O) subunit gamma-12                                                                                                                                                                                                                                       | GNG12                                      | Up-regulated       |
| Q6P2Q9 | Pre-mRNA-processing-splicing factor 8 (220 kDa U5 snRNP-specific protein) (PRP8 homolog) (Splicing factor Prp8) (p220)                                                                                                                                                                                   | PRPF8 PRPC8                                | Up-regulated       |
| P62851 | 40S ribosomal protein S25 (Small ribosomal subunit protein eS25)                                                                                                                                                                                                                                         | RPS25                                      | Up-regulated       |
| P46109 | Crk-like protein                                                                                                                                                                                                                                                                                         | CRKL                                       | Up-regulated       |
| P49821 | NADH dehydrogenase [ubiquinone] flavoprotein 1, mitochondrial (EC 7.1.1.2) (Complex I-51kD) (CI-                                                                                                                                                                                                         | NDUFV1<br>UQOR1                            | Up-regulated       |

|        |                                                                                                                                                                                                                                                                                                                                                                                                                                                                                    |                                      |                |
|--------|------------------------------------------------------------------------------------------------------------------------------------------------------------------------------------------------------------------------------------------------------------------------------------------------------------------------------------------------------------------------------------------------------------------------------------------------------------------------------------|--------------------------------------|----------------|
|        | 51kD) (NADH dehydrogenase flavoprotein 1) (NADH-ubiquinone oxidoreductase 51 kDa subunit)                                                                                                                                                                                                                                                                                                                                                                                          |                                      |                |
| O14737 | Programmed cell death protein 5 (TF-1 cell apoptosis-related protein 19) (Protein TFAR19)                                                                                                                                                                                                                                                                                                                                                                                          | PDCD5<br>TFAR19                      | Up-regulated   |
| Q9NZ01 | Very-long-chain enoyl-CoA reductase (EC 1.3.1.93) (Synaptic glycoprotein SC2) (Trans-2,3-enoyl-CoA reductase) (TER)                                                                                                                                                                                                                                                                                                                                                                | TECR GPSN2<br>SC2                    | Up-regulated   |
| Q96DG6 | Carboxymethylenebutenolidase homolog (EC 3.1.-.-)                                                                                                                                                                                                                                                                                                                                                                                                                                  | CMBL                                 | Up-regulated   |
| Q92888 | Rho guanine nucleotide exchange factor 1 (115 kDa guanine nucleotide exchange factor) (p115-RhoGEF) (p115RhoGEF) (Sub1.5)                                                                                                                                                                                                                                                                                                                                                          | ARHGEF1                              | Up-regulated   |
| Q9UJU6 | Drebrin-like protein (Cervical SH3P7) (Cervical mucin-associated protein) (Drebrin-F) (HPK1-interacting protein of 55 kDa) (HIP-55) (SH3 domain-containing protein 7)                                                                                                                                                                                                                                                                                                              | DBNL CMAP<br>SH3P7 PP5423            | Up-regulated   |
| P09913 | Interferon-induced protein with tetratricopeptide repeats 2 (IFIT-2) (ISG-54 K) (Interferon-induced 54 kDa protein) (IFI-54K) (P54)                                                                                                                                                                                                                                                                                                                                                | IFIT2 CIG-42<br>G10P2 IFI54<br>ISG54 | Up-regulated   |
| P09110 | 3-ketoacyl-CoA thiolase, peroxisomal (EC 2.3.1.16) (Acetyl-CoA acyltransferase) (Beta-ketothiolase) (Peroxisomal 3-oxoacyl-CoA thiolase)                                                                                                                                                                                                                                                                                                                                           | ACAA1 ACAA<br>PTHIO                  | Up-regulated   |
| P13010 | X-ray repair cross-complementing protein 5 (EC 3.6.4.-) (86 kDa subunit of Ku antigen) (ATP-dependent DNA helicase 2 subunit 2) (ATP-dependent DNA helicase II 80 kDa subunit) (CTC box-binding factor 85 kDa subunit) (CTC85) (CTCBF) (DNA repair protein XRCC5) (Ku80) (Ku86) (Lupus Ku autoantigen protein p86) (Nuclear factor IV) (Thyroid-lupus autoantigen) (TLAA) (X-ray repair complementing defective repair in Chinese hamster cells 5 (double-strand-break rejoining)) | XRCC5 G22P2                          | Up-regulated   |
| P12955 | Xaa-Pro dipeptidase (X-Pro dipeptidase) (EC 3.4.13.9) (Imidodipeptidase) (Peptidase D) (Proline dipeptidase) (Prolidase)                                                                                                                                                                                                                                                                                                                                                           | PEPD PRD                             | Up-regulated   |
| Q96Q42 | Alsin (Amyotrophic lateral sclerosis 2 chromosomal region candidate gene 6 protein) (Amyotrophic lateral sclerosis 2 protein)                                                                                                                                                                                                                                                                                                                                                      | ALS2<br>ALS2CR6<br>KIAA1563          | Down-regulated |
| P78344 | Eukaryotic translation initiation factor 4 gamma 2 (eIF-4-gamma 2) (eIF-4G 2) (eIF4G 2) (Death-associated protein 5) (DAP-5) (p97)                                                                                                                                                                                                                                                                                                                                                 | EIF4G2 DAP5<br>OK/SW-cl.75           | Down-regulated |
| Q9UNE7 | E3 ubiquitin-protein ligase CHIP (EC 2.3.2.27) (Antigen NY-CO-7) (CLL-associated antigen KW-8) (Carboxy terminus of Hsp70-interacting protein) (RING-type E3 ubiquitin transferase CHIP) (STIP1 homology and U box-containing protein 1)                                                                                                                                                                                                                                           | STUB1 CHIP<br>PP1131                 | Down-regulated |
| P55263 | Adenosine kinase (AK) (EC 2.7.1.20) (Adenosine 5'-phosphotransferase)                                                                                                                                                                                                                                                                                                                                                                                                              | ADK                                  | Down-regulated |
| Q16204 | Coiled-coil domain-containing protein 6 (Papillary thyroid carcinoma-encoded protein) (Protein H4)                                                                                                                                                                                                                                                                                                                                                                                 | CCDC6<br>D10S170 TST1                | Down-regulated |
| P48047 | ATP synthase subunit O, mitochondrial (ATP synthase peripheral stalk subunit OSCP) (Oligomycin sensitivity conferral protein) (OSCP)                                                                                                                                                                                                                                                                                                                                               | ATP5PO<br>ATP5O ATPO                 | Down-regulated |
| Q9Y333 | U6 snRNA-associated Sm-like protein LSm2 (Protein G7b) (Small nuclear ribonuclear protein D homolog) (snRNP core Sm-like protein Sm-x5)                                                                                                                                                                                                                                                                                                                                            | LSM2 C6orf28<br>G7B                  | Down-regulated |
| Q13561 | Dynactin subunit 2 (50 kDa dynein-associated polypeptide) (Dynactin complex 50 kDa subunit) (DCTN-50) (p50 dynamitin)                                                                                                                                                                                                                                                                                                                                                              | DCTN2<br>DCTN50                      | Down-regulated |

|        |                                                                                                                                                                     |                                      |                |
|--------|---------------------------------------------------------------------------------------------------------------------------------------------------------------------|--------------------------------------|----------------|
| Q9P2B4 | CTTNBP2 N-terminal-like protein                                                                                                                                     | CTTNBP2NL<br>KIAA1433                | Down-regulated |
| Q15404 | Ras suppressor protein 1 (RSP-1) (Rsu-1)                                                                                                                            | RSU1 RSP1                            | Down-regulated |
| O60884 | DnaJ homolog subfamily A member 2 (Cell cycle progression restoration gene 3 protein) (Dnj3) (Dj3) (HIRA-interacting protein 4) (Renal carcinoma antigen NY-REN-14) | DNAJA2 CPR3<br>HIRIP4                | Down-regulated |
| P16035 | Metalloproteinase inhibitor 2 (CSC-21K) (Tissue inhibitor of metalloproteinases 2) (TIMP-2)                                                                         | TIMP2                                | Down-regulated |
| Q9NPA8 | Transcription and mRNA export factor ENY2 (Enhancer of yellow 2 transcription factor homolog)                                                                       | ENY2 DC6                             | Down-regulated |
| P61927 | 60S ribosomal protein L37 (G1.16) (Large ribosomal subunit protein eL37)                                                                                            | RPL37                                | Down-regulated |
| O95373 | Importin-7 (Imp7) (Ran-binding protein 7) (RanBP7)                                                                                                                  | IPO7 RANBP7                          | Down-regulated |
| Q92890 | Ubiquitin recognition factor in ER-associated degradation protein 1 (Ubiquitin fusion degradation protein 1) (UB fusion protein 1)                                  | UFD1 UFD1L                           | Down-regulated |
| P84090 | Enhancer of rudimentary homolog                                                                                                                                     | ERH                                  | Down-regulated |
| P12270 | Nucleoprotein TPR (Megator) (NPC-associated intranuclear protein) (Translocated promoter region protein)                                                            | TPR                                  | Down-regulated |
| O00571 | ATP-dependent RNA helicase DDX3X (EC 3.6.4.13) (CAP-Rf) (DEAD box protein 3, X-chromosomal) (DEAD box, X isoform) (DBX) (Helicase-like protein 2) (HLP2)            | DDX3X DBX<br>DDX3                    | Down-regulated |
| O43795 | Unconventional myosin-Ib (MYH-1c) (Myosin I alpha) (MMI-alpha) (MMIa)                                                                                               | MYO1B                                | Down-regulated |
| P61313 | 60S ribosomal protein L15 (Large ribosomal subunit protein eL15)                                                                                                    | RPL15 EC45<br>TCBAP0781              | Down-regulated |
| Q14677 | Clathrin interactor 1 (Clathrin-interacting protein localized in the trans-Golgi region) (Clint) (Enthoprotin) (Epsin-4) (Epsin-related protein) (EpsinR)           | CLINT1 ENTH<br>EPN4 EPNR<br>KIAA0171 | Down-regulated |
| Q6NYC8 | Phostensin (Protein phosphatase 1 F-actin cytoskeleton-targeting subunit) (Protein phosphatase 1 regulatory subunit 18)                                             | PPP1R18<br>HKMT1098<br>KIAA1949      | Down-regulated |
| P05198 | Eukaryotic translation initiation factor 2 subunit 1 (Eukaryotic translation initiation factor 2 subunit alpha) (eIF-2-alpha) (eIF-2A) (eIF-2alpha)                 | EIF2S1 EIF2A                         | Down-regulated |
| Q13409 | Cytoplasmic dynein 1 intermediate chain 2 (Cytoplasmic dynein intermediate chain 2) (Dynein intermediate chain 2, cytosolic) (DH IC-2)                              | DYNC1I2<br>DNCI2<br>DNCIC2           | Down-regulated |
| Q9UHB9 | Signal recognition particle subunit SRP68 (SRP68) (Signal recognition particle 68 kDa protein)                                                                      | SRP68                                | Down-regulated |
| Q9UHV9 | Prefoldin subunit 2                                                                                                                                                 | PFDN2 PFD2<br>HSPC231                | Down-regulated |
| P53621 | Coatomer subunit alpha (Alpha-coat protein) (Alpha-COP) (HEP-COP) (HEPCOP) [Cleaved into: Xenin (Xenopsin-related peptide); Proxenin]                               | COPA                                 | Down-regulated |
| P53618 | Coatomer subunit beta (Beta-coat protein) (Beta-COP)                                                                                                                | COPB1 COPB<br>MSTP026                | Down-regulated |

**Table S2.** Full list of differentially expressed proteins in tip vs. veh,  $p < 0.01$  and  $FDR < 0.1$ .

| Entry  | Protein names                                                                                                                                                                                                                                 | Gene names                      | Protein expression |
|--------|-----------------------------------------------------------------------------------------------------------------------------------------------------------------------------------------------------------------------------------------------|---------------------------------|--------------------|
| Q16658 | Fascin (55 kDa actin-bundling protein) (Singed-like protein) (p55)                                                                                                                                                                            | FSCN1 FAN1 HSN SNL              | Up-regulated       |
| Q9Y3D6 | Mitochondrial fission 1 protein (FIS1 homolog) (hFis1) (Tetratricopeptide repeat protein 11) (TPR repeat protein 11)                                                                                                                          | FIS1 TTC11 CGI-135              | Up-regulated       |
| Q9NQC3 | Reticulon-4 (Foocen) (Neurite outgrowth inhibitor) (Nogo protein) (Neuroendocrine-specific protein) (NSP) (Neuroendocrine-specific protein C homolog) (RTN-x) (Reticulon-5)                                                                   | RTN4 KIAA0886 NOGO My043 SP1507 | Up-regulated       |
| O95819 | Mitogen-activated protein kinase kinase kinase 4 (EC 2.7.11.1) (HPK/GCK-like kinase HGK) (MAPK/ERK kinase kinase 4) (MEK kinase kinase 4) (MEKKK 4) (Nck-interacting kinase)                                                                  | MAP4K4 HGK KIAA0687 NIK         | Up-regulated       |
| Q4KWH8 | 1-phosphatidylinositol 4,5-bisphosphate phosphodiesterase eta-1 (EC 3.1.4.11) (Phosphoinositide phospholipase C-eta-1) (Phospholipase C-eta-1) (PLC-eta-1) (Phospholipase C-like protein 3) (PLC-L3)                                          | PLCH1 KIAA1069 PLCL3            | Up-regulated       |
| P63167 | Dynein light chain 1, cytoplasmic (8 kDa dynein light chain) (DLC8) (Dynein light chain LC8-type 1) (Protein inhibitor of neuronal nitric oxide synthase) (PIN)                                                                               | DYNLL1 DLC1 DNCL1 DNCLC1 HDLC1  | Up-regulated       |
| O75439 | Mitochondrial-processing peptidase subunit beta (EC 3.4.24.64) (Beta-MPP) (P-52)                                                                                                                                                              | PMPCB MPPB                      | Up-regulated       |
| P05141 | ADP/ATP translocase 2 (ADP,ATP carrier protein 2) (ADP,ATP carrier protein, fibroblast isoform) (Adenine nucleotide translocator 2) (ANT 2) (Solute carrier family 25 member 5) [Cleaved into: ADP/ATP translocase 2, N-terminally processed] | SLC25A5 ANT2                    | Up-regulated       |
| Q9UHB9 | Signal recognition particle subunit SRP68 (SRP68) (Signal recognition particle 68 kDa protein)                                                                                                                                                | SRP68                           | Up-regulated       |
| O75165 | DnaJ homolog subfamily C member 13 (Required for receptor-mediated endocytosis 8) (RME-8)                                                                                                                                                     | DNAJC13 KIAA0678 RME8           | Up-regulated       |
| O43169 | Cytochrome b5 type B (Cytochrome b5 outer mitochondrial membrane isoform)                                                                                                                                                                     | CYB5B CYB5M OMB5                | Up-regulated       |
| P58546 | Myotrophin (Protein V-1)                                                                                                                                                                                                                      | MTPN                            | Up-regulated       |
| P63096 | Guanine nucleotide-binding protein G(i) subunit alpha-1 (Adenylate cyclase-inhibiting G alpha protein)                                                                                                                                        | GNAI1                           | Up-regulated       |
| Q12904 | Aminoacyl tRNA synthase complex-interacting multifunctional protein 1 (Multisynthase complex auxiliary                                                                                                                                        | AIMP1 EMAP2 SCYE1               | Up-regulated       |

|        |                                                                                                                                                                                                                          |                                |              |
|--------|--------------------------------------------------------------------------------------------------------------------------------------------------------------------------------------------------------------------------|--------------------------------|--------------|
|        | component p43) [Cleaved into: Endothelial monocyte-activating polypeptide 2 (EMAP-2) (Endothelial monocyte-activating polypeptide II) (EMAP-II) (Small inducible cytokine subfamily E member 1)]                         |                                |              |
| Q13162 | Peroxiredoxin-4 (EC 1.11.1.24) (Antioxidant enzyme AOE372) (AOE37-2) (Peroxiredoxin IV) (Prx-IV) (Thioredoxin peroxidase A0372) (Thioredoxin-dependent peroxide reductase A0372) (Thioredoxin-dependent peroxiredoxin 4) | PRDX4                          | Up-regulated |
| P21589 | 5'-nucleotidase (5'-NT) (EC 3.1.3.5) (Ecto-5'-nucleotidase) (CD antigen CD73)                                                                                                                                            | NT5E NT5 NTE                   | Up-regulated |
| O75340 | Programmed cell death protein 6 (Apoptosis-linked gene 2 protein homolog) (ALG-2)                                                                                                                                        | PDCD6 ALG2                     | Up-regulated |
| P09914 | Interferon-induced protein with tetratricopeptide repeats 1 (IFIT-1) (Interferon-induced 56 kDa protein) (IFI-56K) (P56)                                                                                                 | IFIT1 G10P1 IFI56 IFNAI1 ISG56 | Up-regulated |
| Q14108 | Lysosome membrane protein 2 (85 kDa lysosomal membrane sialoglycoprotein) (LGP85) (CD36 antigen-like 2) (Lysosome membrane protein II) (LIMP II) (Scavenger receptor class B member 2) (CD antigen CD36)                 | SCARB2 CD36L2 LIMP2 LIMPII     | Up-regulated |
| P47755 | F-actin-capping protein subunit alpha-2 (CapZ alpha-2)                                                                                                                                                                   | CAPZA2                         | Up-regulated |
| Q6IBS0 | Twinfilin-2 (A6-related protein) (hA6RP) (Protein tyrosine kinase 9-like) (Twinfilin-1-like protein)                                                                                                                     | TWF2 PTK9L MSTP011             | Up-regulated |
| P14174 | Macrophage migration inhibitory factor (MIF) (EC 5.3.2.1) (Glycosylation-inhibiting factor) (GIF) (L-dopachrome isomerase) (L-dopachrome tautomerase) (EC 5.3.3.12) (Phenylpyruvate tautomerase)                         | MIF GLIF MMIF                  | Up-regulated |
| P60903 | Protein S100-A10 (Calpactin I light chain) (Calpactin-1 light chain) (Cellular ligand of annexin II) (S100 calcium-binding protein A10) (p10 protein) (p11)                                                              | S100A10 ANX2LG CAL1L CLP11     | Up-regulated |
| P06703 | Protein S100-A6 (Calcyclin) (Growth factor-inducible protein 2A9) (MLN 4) (Prolactin receptor-associated protein) (PRA) (S100 calcium-binding protein A6)                                                                | S100A6 CACY                    | Up-regulated |
| P06744 | Glucose-6-phosphate isomerase (GPI) (EC 5.3.1.9) (Autocrine motility factor) (AMF) (Neuroleukin) (NLK) (Phosphoglucose isomerase) (PGI)                                                                                  | GPI                            | Up-regulated |

|        |                                                                                                                                                                                                                                                                                                |                                  |              |
|--------|------------------------------------------------------------------------------------------------------------------------------------------------------------------------------------------------------------------------------------------------------------------------------------------------|----------------------------------|--------------|
|        | (Phosphohexose isomerase) (PHI)<br>(Sperm antigen 36) (SA-36)                                                                                                                                                                                                                                  |                                  |              |
| P52594 | Arf-GAP domain and FG repeat-containing protein 1 (HIV-1 Rev-binding protein) (Nucleoporin-like protein RIP) (Rev-interacting protein) (Rev/Rex activation domain-binding protein)                                                                                                             | AGFG1 HRB RAB RIP                | Up-regulated |
| Q03518 | Antigen peptide transporter 1 (APT1) (ATP-binding cassette sub-family B member 2) (Peptide supply factor 1) (Peptide transporter PSF1) (PSF-1) (Peptide transporter TAP1) (Peptide transporter involved in antigen processing 1) (Really interesting new gene 4 protein)                       | TAP1 ABCB2 PSF1 RING4 Y3         | Up-regulated |
| P07355 | Annexin A2 (Annexin II) (Annexin-2) (Calpactin I heavy chain) (Calpactin-1 heavy chain) (Chromobindin-8) (Lipocortin II) (Placental anticoagulant protein IV) (PAP-IV) (Protein I) (p36)                                                                                                       | ANXA2 ANX2 ANX2L4<br>CAL1H LPC2D | Up-regulated |
| Q92882 | Osteoclast-stimulating factor 1                                                                                                                                                                                                                                                                | OSTF1                            | Up-regulated |
| P62851 | 40S ribosomal protein S25 (Small ribosomal subunit protein eS25)                                                                                                                                                                                                                               | RPS25                            | Up-regulated |
| O60502 | Protein O-GlcNAcase (OGA) (EC 3.2.1.169) (Beta-N-acetylglucosaminidase) (Beta-N-acetylhexosaminidase) (Beta-hexosaminidase) (Meningioma-expressed antigen 5) (N-acetyl-beta-D-glucosaminidase) (N-acetyl-beta-glucosaminidase) (Nuclear cytoplasmic O-GlcNAcase and acetyltransferase) (NCOAT) | OGA HEXC KIAA0679 MEA5<br>MGEA5  | Up-regulated |
| Q9HAY6 | Beta,beta-carotene 15,15'-dioxygenase (EC 1.13.11.63) (Beta-carotene dioxygenase 1) (Beta-carotene oxygenase 1)                                                                                                                                                                                | BCO1 BCDO BCDO1 BCMO1            | Up-regulated |
| P60484 | Phosphatidylinositol 3,4,5-trisphosphate 3-phosphatase and dual-specificity protein phosphatase PTEN (EC 3.1.3.16) (EC 3.1.3.48) (EC 3.1.3.67) (Mutated in multiple advanced cancers 1) (Phosphatase and tensin homolog)                                                                       | PTEN MMAC1 TEP1                  | Up-regulated |
| Q96TA1 | Protein Niban 2 (Meg-3) (Melanoma invasion by ERK) (MINERVA) (Niban-like protein 1) (Protein FAM129B)                                                                                                                                                                                          | NIBAN2 C9orf88 FAM129B           | Up-regulated |
| Q92888 | Rho guanine nucleotide exchange factor 1 (115 kDa guanine nucleotide exchange factor) (p115-RhoGEF) (p115RhoGEF) (Sub1.5)                                                                                                                                                                      | ARHGEF1                          | Up-regulated |
| P84085 | ADP-ribosylation factor 5                                                                                                                                                                                                                                                                      | ARF5                             | Up-regulated |
| P04264 | Keratin, type II cytoskeletal 1 (67 kDa cytokeratin) (Cytokeratin-1) (CK-1) (Hair alpha protein)                                                                                                                                                                                               | KRT1 KRTA                        | Up-regulated |

|        |                                                                                                                                                                                                                                                                 |                                   |              |
|--------|-----------------------------------------------------------------------------------------------------------------------------------------------------------------------------------------------------------------------------------------------------------------|-----------------------------------|--------------|
|        | (Keratin-1) (K1) (Type-II keratin Kb1)                                                                                                                                                                                                                          |                                   |              |
| P49902 | Cytosolic purine 5'-nucleotidase (EC 3.1.3.5) (Cytosolic 5'-nucleotidase II)                                                                                                                                                                                    | NT5C2 NT5B NT5CP PNT5             | Up-regulated |
| Q9Y646 | Carboxypeptidase Q (EC 3.4.17.-) (Lysosomal dipeptidase) (Plasma glutamate carboxypeptidase)                                                                                                                                                                    | CPQ LCH1 PGCP                     | Up-regulated |
| P29692 | Elongation factor 1-delta (EF-1-delta) (Antigen NY-CO-4)                                                                                                                                                                                                        | EEF1D EF1D                        | Up-regulated |
| Q8IWB7 | WD repeat and FYVE domain-containing protein 1 (FYVE domain-containing protein localized to endosomes 1) (FENS-1) (Phosphoinositide-binding protein 1) (WD40- and FYVE domain-containing protein 1) (Zinc finger FYVE domain-containing protein 17)             | WDFY1 FENS1 KIAA1435 WDF1 ZFYVE17 | Up-regulated |
| Q96DG6 | Carboxymethylenebutenolidase homolog (EC 3.1.-.-)                                                                                                                                                                                                               | CMBL                              | Up-regulated |
| Q5QNW6 | Histone H2B type 2-F (H2B-clustered histone 18)                                                                                                                                                                                                                 | H2BC18 HIST2H2BF                  | Up-regulated |
| Q7L014 | Probable ATP-dependent RNA helicase DDX46 (EC 3.6.4.13) (DEAD box protein 46) (PRP5 homolog)                                                                                                                                                                    | DDX46 KIAA0801                    | Up-regulated |
| Q9BW60 | Elongation of very long chain fatty acids protein 1 (EC 2.3.1.199) (3-keto acyl-CoA synthase ELOVL1) (ELOVL fatty acid elongase 1) (ELOVL FA elongase 1) (Very long chain 3-ketoacyl-CoA synthase 1) (Very long chain 3-oxoacyl-CoA synthase 1)                 | ELOVL1 SSC1 CGI-88                | Up-regulated |
| O14879 | Interferon-induced protein with tetratricopeptide repeats 3 (IFIT-3) (CIG49) (ISG-60) (Interferon-induced 60 kDa protein) (IFI-60K) (Interferon-induced protein with tetratricopeptide repeats 4) (IFIT-4) (Retinoic acid-induced gene G protein) (P60) (RIG-G) | IFIT3 CIG-49 IFI60 IFIT4 ISG60    | Up-regulated |
| P00403 | Cytochrome c oxidase subunit 2 (EC 7.1.1.9) (Cytochrome c oxidase polypeptide II)                                                                                                                                                                               | MT-CO2 COII COX2 COXII MTCO2      | Up-regulated |
| P19367 | Hexokinase-1 (EC 2.7.1.1) (Brain form hexokinase) (Hexokinase type I) (HK I) (Hexokinase-A)                                                                                                                                                                     | HK1                               | Up-regulated |
| P09110 | 3-ketoacyl-CoA thiolase, peroxisomal (EC 2.3.1.16) (Acetyl-CoA acyltransferase) (Beta-ketothiolase) (Peroxisomal 3-oxoacyl-CoA thiolase)                                                                                                                        | ACAA1 ACAA PTHIO                  | Up-regulated |
| O95497 | Pantetheinase (EC 3.5.1.92) (Pantetheine hydrolase) (Tiff66) (Vascular non-inflammatory molecule 1) (Vanin-1)                                                                                                                                                   | VNN1                              | Up-regulated |
| Q9UBI6 | Guanine nucleotide-binding protein G(I)/G(S)/G(O) subunit gamma-12                                                                                                                                                                                              | GNG12                             | Up-regulated |



|        |                                                                                                                                                                                                                                                                                                                                                                                                                                                                                    |                                                                                                                                                                                                                                                                                                                                                                      |                |
|--------|------------------------------------------------------------------------------------------------------------------------------------------------------------------------------------------------------------------------------------------------------------------------------------------------------------------------------------------------------------------------------------------------------------------------------------------------------------------------------------|----------------------------------------------------------------------------------------------------------------------------------------------------------------------------------------------------------------------------------------------------------------------------------------------------------------------------------------------------------------------|----------------|
| P12235 | ADP/ATP translocase 1 (ADP,ATP carrier protein 1) (ADP,ATP carrier protein, heart/skeletal muscle isoform T1) (Adenine nucleotide translocator 1) (ANT 1) (Solute carrier family 25 member 4)                                                                                                                                                                                                                                                                                      | SLC25A4 ANT1                                                                                                                                                                                                                                                                                                                                                         | Up-regulated   |
| P62805 | Histone H4                                                                                                                                                                                                                                                                                                                                                                                                                                                                         | H4C1 H4/A H4FA HIST1H4A; H4C2 H4/I H4FI HIST1H4B; H4C3 H4/G H4FG HIST1H4C; H4C4 H4/B H4FB HIST1H4D; H4C5 H4/J H4FJ HIST1H4E; H4C6 H4/C H4FC HIST1H4F; H4C8 H4/H H4FH HIST1H4H; H4C9 H4/M H4FM HIST1H4I; H4C11 H4/E H4FE HIST1H4J; H4C12 H4/D H4FD HIST1H4K; H4C13 H4/K H4FK HIST1H4L; H4C14 H4/N H4F2 H4FN HIST2H4 HIST2H4A; H4C15 H4/O H4FO HIST2H4B; H4-16 HIST4H4 | Up-regulated   |
| O95573 | Long-chain-fatty-acid--CoA ligase 3 (EC 6.2.1.3) (Arachidonate--CoA ligase) (EC 6.2.1.15) (Long-chain acyl-CoA synthetase 3) (LACS 3)                                                                                                                                                                                                                                                                                                                                              | ACSL3 ACS3 FACL3 LACS3                                                                                                                                                                                                                                                                                                                                               | Up-regulated   |
| O14737 | Programmed cell death protein 5 (TF-1 cell apoptosis-related protein 19) (Protein TFAR19)                                                                                                                                                                                                                                                                                                                                                                                          | PDCD5 TFAR19                                                                                                                                                                                                                                                                                                                                                         | Up-regulated   |
| P13010 | X-ray repair cross-complementing protein 5 (EC 3.6.4.-) (86 kDa subunit of Ku antigen) (ATP-dependent DNA helicase 2 subunit 2) (ATP-dependent DNA helicase II 80 kDa subunit) (CTC box-binding factor 85 kDa subunit) (CTC85) (CTCBF) (DNA repair protein XRCC5) (Ku80) (Ku86) (Lupus Ku autoantigen protein p86) (Nuclear factor IV) (Thyroid-lupus autoantigen) (TLAA) (X-ray repair complementing defective repair in Chinese hamster cells 5 (double-strand-break rejoining)) | XRCC5 G22P2                                                                                                                                                                                                                                                                                                                                                          | Up-regulated   |
| P09913 | Interferon-induced protein with tetratricopeptide repeats 2 (IFIT-2) (ISG-54 K) (Interferon-induced 54 kDa protein) (IFI-54K) (P54)                                                                                                                                                                                                                                                                                                                                                | IFIT2 CIG-42 G10P2 IFI54 ISG54                                                                                                                                                                                                                                                                                                                                       | Up-regulated   |
| Q96Q42 | Alsin (Amyotrophic lateral sclerosis 2 chromosomal region candidate gene 6 protein) (Amyotrophic lateral sclerosis 2 protein)                                                                                                                                                                                                                                                                                                                                                      | ALS2 ALS2CR6 KIAA1563                                                                                                                                                                                                                                                                                                                                                | Down-regulated |
| P53618 | Coatmer subunit beta (Beta-coat protein) (Beta-COP)                                                                                                                                                                                                                                                                                                                                                                                                                                | COPB1 COPB MSTP026                                                                                                                                                                                                                                                                                                                                                   | Down-regulated |
| O43294 | Transforming growth factor beta-1-induced transcript 1 protein (Androgen receptor coactivator 55 kDa protein) (Androgen receptor-associated protein of 55 kDa)                                                                                                                                                                                                                                                                                                                     | TGFB1I1 ARA55                                                                                                                                                                                                                                                                                                                                                        | Down-regulated |

|        |                                                                                                                                                                                                                                          |                            |                |
|--------|------------------------------------------------------------------------------------------------------------------------------------------------------------------------------------------------------------------------------------------|----------------------------|----------------|
|        | (Hydrogen peroxide-inducible clone 5 protein) (Hic-5)                                                                                                                                                                                    |                            |                |
| Q9NX63 | MICOS complex subunit MIC19 (Coiled-coil-helix-coiled-coil-helix domain-containing protein 3)                                                                                                                                            | CHCHD3 MIC19 MINOS3        | Down-regulated |
| O43795 | Unconventional myosin-Ib (MYH-1c) (Myosin I alpha) (MMI-alpha) (MMIa)                                                                                                                                                                    | MYO1B                      | Down-regulated |
| Q9NP79 | Vacuolar protein sorting-associated protein VTA1 homolog (Dopamine-responsive gene 1 protein) (DRG-1) (LYST-interacting protein 5) (LIP5) (SKD1-binding protein 1) (SBP1)                                                                | VTA1 C6orf55 HSPC228 My012 | Down-regulated |
| Q9UNE7 | E3 ubiquitin-protein ligase CHIP (EC 2.3.2.27) (Antigen NY-CO-7) (CLL-associated antigen KW-8) (Carboxy terminus of Hsp70-interacting protein) (RING-type E3 ubiquitin transferase CHIP) (STIP1 homology and U box-containing protein 1) | STUB1 CHIP PP1131          | Down-regulated |
| Q9P2B4 | CTTNBP2 N-terminal-like protein                                                                                                                                                                                                          | CTTNBP2NL KIAA1433         | Down-regulated |
| P46459 | Vesicle-fusing ATPase (EC 3.6.4.6) (N-ethylmaleimide-sensitive fusion protein) (NEM-sensitive fusion protein) (Vesicular-fusion protein NSF)                                                                                             | NSF                        | Down-regulated |
| P21399 | Cytoplasmic aconitate hydratase (Aconitase) (EC 4.2.1.3) (Citrate hydro-lyase) (Ferritin repressor protein) (Iron regulatory protein 1) (IRP1) (Iron-responsive element-binding protein 1) (IRE-BP 1)                                    | ACO1 IREB1                 | Down-regulated |
| Q08211 | ATP-dependent RNA helicase A (EC 3.6.4.13) (DEAH box protein 9) (DExH-box helicase 9) (Leukophysin) (LKP) (Nuclear DNA helicase II) (NDH II) (RNA helicase A)                                                                            | DHX9 DDX9 LKP NDH2         | Down-regulated |
| Q1KMD3 | Heterogeneous nuclear ribonucleoprotein U-like protein 2 (Scaffold-attachment factor A2) (SAF-A2)                                                                                                                                        | HNRNPUL2 HNRPUL2           | Down-regulated |
| P54578 | Ubiquitin carboxyl-terminal hydrolase 14 (EC 3.4.19.12) (Deubiquitinating enzyme 14) (Ubiquitin thioesterase 14) (Ubiquitin-specific-processing protease 14)                                                                             | USP14 TGT                  | Down-regulated |
| Q04637 | Eukaryotic translation initiation factor 4 gamma 1 (eIF-4-gamma 1) (eIF-4G 1) (eIF-4G1) (p220)                                                                                                                                           | EIF4G1 EIF4F EIF4G EIF4GI  | Down-regulated |
| Q15165 | Serum paraoxonase/arylesterase 2 (PON 2) (EC 3.1.1.2) (EC 3.1.1.81) (Aromatic esterase 2) (A-esterase 2) (Serum arylalkylphosphatase 2)                                                                                                  | PON2                       | Down-regulated |
| P43487 | Ran-specific GTPase-activating protein (Ran-binding protein 1) (RanBP1)                                                                                                                                                                  | RANBP1                     | Down-regulated |

|        |                                                                                                                                                                                                                                 |                            |                |
|--------|---------------------------------------------------------------------------------------------------------------------------------------------------------------------------------------------------------------------------------|----------------------------|----------------|
| P22061 | Protein-L-isoaspartate(D-aspartate) O-methyltransferase (PIMT) (EC 2.1.1.77) (L-isoaspartyl protein carboxyl methyltransferase) (Protein L-isoaspartyl/D-aspartyl methyltransferase) (Protein-beta-aspartate methyltransferase) | PCMT1                      | Down-regulated |
| P16035 | Metalloproteinase inhibitor 2 (CSC-21K) (Tissue inhibitor of metalloproteinases 2) (TIMP-2)                                                                                                                                     | TIMP2                      | Down-regulated |
| O60884 | DnaJ homolog subfamily A member 2 (Cell cycle progression restoration gene 3 protein) (Dnj3) (Dj3) (HIRA-interacting protein 4) (Renal carcinoma antigen NY-REN-14)                                                             | DNAJA2 CPR3 HIRIP4         | Down-regulated |
| Q9Y333 | U6 snRNA-associated Sm-like protein LSM2 (Protein G7b) (Small nuclear ribonuclear protein D homolog) (snRNP core Sm-like protein Sm-x5)                                                                                         | LSM2 C6orf28 G7B           | Down-regulated |
| P55263 | Adenosine kinase (AK) (EC 2.7.1.20) (Adenosine 5'-phosphotransferase)                                                                                                                                                           | ADK                        | Down-regulated |
| Q12792 | Twinfilin-1 (Protein A6) (Protein tyrosine kinase 9)                                                                                                                                                                            | TWF1 PTK9                  | Down-regulated |
| P83731 | 60S ribosomal protein L24 (60S ribosomal protein L30) (Large ribosomal subunit protein eL24)                                                                                                                                    | RPL24                      | Down-regulated |
| O00571 | ATP-dependent RNA helicase DDX3X (EC 3.6.4.13) (CAP-Rf) (DEAD box protein 3, X-chromosomal) (DEAD box, X isoform) (DBX) (Helicase-like protein 2) (HLP2)                                                                        | DDX3X DBX DDX3             | Down-regulated |
| P43243 | Matrin-3                                                                                                                                                                                                                        | MATR3 KIAA0723             | Down-regulated |
| O00629 | Importin subunit alpha-3 (Importin alpha Q1) (Qip1) (Karyopherin subunit alpha-4)                                                                                                                                               | KPNA4 QIP1                 | Down-regulated |
| Q9NTK5 | Obg-like ATPase 1 (DNA damage-regulated overexpressed in cancer 45) (DOC45) (GTP-binding protein 9)                                                                                                                             | OLA1 GTPBP9 PRO2455 PTD004 | Down-regulated |
| Q02809 | Procollagen-lysine,2-oxoglutarate 5-dioxygenase 1 (EC 1.14.11.4) (Lysyl hydroxylase 1) (LH1)                                                                                                                                    | PLOD1 LLH PLOD             | Down-regulated |
| Q9NY33 | Dipeptidyl peptidase 3 (EC 3.4.14.4) (Dipeptidyl aminopeptidase III) (Dipeptidyl arylamidase III) (Dipeptidyl peptidase III) (DPP III) (Enkephalinase B)                                                                        | DPP3                       | Down-regulated |
| Q14194 | Dihydropyrimidinase-related protein 1 (DRP-1) (Collapsin response mediator protein 1) (CRMP-1) (Inactive dihydropyrimidinase) (Unc-33-like phosphoprotein 3) (ULIP-3)                                                           | CRMP1 DPYSL1 ULIP3         | Down-regulated |
| Q92896 | Golgi apparatus protein 1 (CFR-1) (Cysteine-rich fibroblast growth factor receptor) (E-selectin ligand 1)                                                                                                                       | GLG1 CFR1 ESL1 MG160       | Down-regulated |

|        |                                                                                                                                                                                                                                                                                                                                                                                                          |                                       |                |
|--------|----------------------------------------------------------------------------------------------------------------------------------------------------------------------------------------------------------------------------------------------------------------------------------------------------------------------------------------------------------------------------------------------------------|---------------------------------------|----------------|
|        | (ESL-1) (Golgi sialoglycoprotein MG-160)                                                                                                                                                                                                                                                                                                                                                                 |                                       |                |
| P61313 | 60S ribosomal protein L15 (Large ribosomal subunit protein eL15)                                                                                                                                                                                                                                                                                                                                         | RPL15 EC45 TCBAP0781                  | Down-regulated |
| Q9H0U4 | Ras-related protein Rab-1B                                                                                                                                                                                                                                                                                                                                                                               | RAB1B                                 | Down-regulated |
| Q9NYF8 | Bcl-2-associated transcription factor 1 (Btf) (BCLAF1 and THRAP3 family member 1)                                                                                                                                                                                                                                                                                                                        | BCLAF1 BTF KIAA0164                   | Down-regulated |
| Q9UNM6 | 26S proteasome non-ATPase regulatory subunit 13 (26S proteasome regulatory subunit RPN9) (26S proteasome regulatory subunit S11) (26S proteasome regulatory subunit p40.5)                                                                                                                                                                                                                               | PSMD13                                | Down-regulated |
| Q5JPE7 | Nodal modulator 2 (pM5 protein 2)                                                                                                                                                                                                                                                                                                                                                                        | NOMO2                                 | Down-regulated |
| Q92890 | Ubiquitin recognition factor in ER-associated degradation protein 1 (Ubiquitin fusion degradation protein 1) (UB fusion protein 1)                                                                                                                                                                                                                                                                       | UFD1 UFD1L                            | Down-regulated |
| Q9Y2S6 | Translation machinery-associated protein 7 (Coiled-coil domain-containing protein 72)                                                                                                                                                                                                                                                                                                                    | TMA7 CCDC72 HSPC016 HSPC330           | Down-regulated |
| Q13510 | Acid ceramidase (AC) (ACDase) (Acid CDase) (EC 3.5.1.23) (Acylsphingosine deacylase) (N-acylethanolamine hydrolase ASAH1) (EC 3.5.1.-) (N-acylsphingosine amidohydrolase) (Putative 32 kDa heart protein) (PHP32) [Cleaved into: Acid ceramidase subunit alpha; Acid ceramidase subunit beta]                                                                                                            | ASAH1 ASAH HSD-33 HSD33               | Down-regulated |
| P14927 | Cytochrome b-c1 complex subunit 7 (Complex III subunit 7) (Complex III subunit VII) (QP-C) (Ubiquinol-cytochrome c reductase complex 14 kDa protein)                                                                                                                                                                                                                                                     | UQCRB UQBP                            | Down-regulated |
| P50570 | Dynamin-2 (EC 3.6.5.5)                                                                                                                                                                                                                                                                                                                                                                                   | DNM2 DYN2                             | Down-regulated |
| Q7Z6Z7 | E3 ubiquitin-protein ligase HUWE1 (EC 2.3.2.26) (ARF-binding protein 1) (ARF-BP1) (HECT, UBA and WWE domain-containing protein 1) (HECT-type E3 ubiquitin transferase HUWE1) (Homologous to E6AP carboxyl terminus homologous protein 9) (HectH9) (Large structure of UREB1) (LASU1) (Mcl-1 ubiquitin ligase E3) (Mule) (Upstream regulatory element-binding protein 1) (URE-B1) (URE-binding protein 1) | HUWE1 KIAA0312 KIAA1578 UREB1 HSPC272 | Down-regulated |
| Q92598 | Heat shock protein 105 kDa (Antigen NY-CO-25) (Heat shock 110 kDa protein)                                                                                                                                                                                                                                                                                                                               | HSPH1 HSP105 HSP110 KIAA0201          | Down-regulated |
| O00244 | Copper transport protein ATOX1 (Metal transport protein ATX1)                                                                                                                                                                                                                                                                                                                                            | ATOX1 HAH1                            | Down-regulated |

|        |                                                                                                                                                                                                            |                          |                |
|--------|------------------------------------------------------------------------------------------------------------------------------------------------------------------------------------------------------------|--------------------------|----------------|
| O00231 | 26S proteasome non-ATPase regulatory subunit 11 (26S proteasome regulatory subunit RPN6) (26S proteasome regulatory subunit S9) (26S proteasome regulatory subunit p44.5)                                  | PSMD11                   | Down-regulated |
| Q8WUP2 | Filamin-binding LIM protein 1 (FBLP-1) (Migfilin) (Mitogen-inducible 2-interacting protein) (MIG2-interacting protein)                                                                                     | FBLIM1 FBLP1             | Down-regulated |
| P25786 | Proteasome subunit alpha type-1 (EC 3.4.25.1) (30 kDa prosomal protein) (PROS-30) (Macropain subunit C2) (Multicatalytic endopeptidase complex subunit C2) (Proteasome component C2) (Proteasome nu chain) | PSMA1 HC2 NU PROS30 PSC2 | Down-regulated |
| P05121 | Plasminogen activator inhibitor 1 (PAI) (PAI-1) (Endothelial plasminogen activator inhibitor) (Serpine E1)                                                                                                 | SERPINE1 PAI1 PLANH1     | Down-regulated |
| P52597 | Heterogeneous nuclear ribonucleoprotein F (hnRNP F) (Nucleolin-like protein mcs94-1) [Cleaved into: Heterogeneous nuclear ribonucleoprotein F, N-terminally processed]                                     | HNRNPF HNRPF             | Down-regulated |
| Q9UBR2 | Cathepsin Z (EC 3.4.18.1) (Cathepsin P) (Cathepsin X)                                                                                                                                                      | CTSZ                     | Down-regulated |
| O43615 | Mitochondrial import inner membrane translocase subunit TIM44                                                                                                                                              | TIMM44 MIMT44 TIM44      | Down-regulated |
| P60468 | Protein transport protein Sec61 subunit beta                                                                                                                                                               | SEC61B                   | Down-regulated |
| P61513 | 60S ribosomal protein L37a (Large ribosomal subunit protein eL43)                                                                                                                                          | RPL37A                   | Down-regulated |
| P10253 | Lysosomal alpha-glucosidase (EC 3.2.1.20) (Acid maltase) (Aglucosidase alfa) [Cleaved into: 76 kDa lysosomal alpha-glucosidase; 70 kDa lysosomal alpha-glucosidase]                                        | GAA                      | Down-regulated |
| P42766 | 60S ribosomal protein L35 (Large ribosomal subunit protein uL29)                                                                                                                                           | RPL35                    | Down-regulated |
| P12270 | Nucleoprotein TPR (Megator) (NPC-associated intranuclear protein) (Translocated promoter region protein)                                                                                                   | TPR                      | Down-regulated |
| Q15404 | Ras suppressor protein 1 (RSP-1) (Rsu-1)                                                                                                                                                                   | RSU1 RSP1                | Down-regulated |
| P05198 | Eukaryotic translation initiation factor 2 subunit 1 (Eukaryotic translation initiation factor 2 subunit alpha) (eIF-2-alpha) (eIF-2A) (eIF-2alpha)                                                        | EIF2S1 EIF2A             | Down-regulated |
| P48047 | ATP synthase subunit O, mitochondrial (ATP synthase peripheral stalk subunit OSCP) (Oligomycin sensitivity conferral protein) (OSCP)                                                                       | ATP5PO ATP5O ATPO        | Down-regulated |

|        |                                                                                                                                                                |                                |                |
|--------|----------------------------------------------------------------------------------------------------------------------------------------------------------------|--------------------------------|----------------|
| Q15121 | Astrocytic phosphoprotein PEA-15 (15 kDa phosphoprotein enriched in astrocytes) (Phosphoprotein enriched in diabetes) (PED)                                    | PEA15                          | Down-regulated |
| Q14677 | Clathrin interactor 1 (Clathrin-interacting protein localized in the trans-Golgi region) (Clint) (Enthoprotin) (Epsin-4) (Epsin-related protein) (EpsinR)      | CLINT1 ENTH EPN4 EPNR KIAA0171 | Down-regulated |
| Q99426 | Tubulin-folding cofactor B (Cytoskeleton-associated protein 1) (Cytoskeleton-associated protein CKAP1) (Tubulin-specific chaperone B)                          | TBCB CG22 CKAP1                | Down-regulated |
| Q9UHB6 | LIM domain and actin-binding protein 1 (Epithelial protein lost in neoplasm)                                                                                   | LIMA1 EPLIN SREBP3 PP624       | Down-regulated |
| Q562R1 | Beta-actin-like protein 2 (Kappa-actin)                                                                                                                        | ACTBL2                         | Down-regulated |
| P83916 | Chromobox protein homolog 1 (HP1Hsbeta) (Heterochromatin protein 1 homolog beta) (HP1 beta) (Heterochromatin protein p25) (M31) (Modifier 1 protein) (p25beta) | CBX1 CBX                       | Down-regulated |
| P52943 | Cysteine-rich protein 2 (CRP-2) (Protein ESP1)                                                                                                                 | CRIP2 CRP2                     | Down-regulated |
| Q14192 | Four and a half LIM domains protein 2 (FHL-2) (LIM domain protein DRAL) (Skeletal muscle LIM-protein 3) (SLIM-3)                                               | FHL2 DRAL SLIM3                | Down-regulated |
| Q9UKY7 | Protein CDV3 homolog                                                                                                                                           | CDV3 H41                       | Down-regulated |
| Q13409 | Cytoplasmic dynein 1 intermediate chain 2 (Cytoplasmic dynein intermediate chain 2) (Dynein intermediate chain 2, cytosolic) (DH IC-2)                         | DYNC1I2 DNCI2 DNCIC2           | Down-regulated |
| P26599 | Polypyrimidine tract-binding protein 1 (PTB) (57 kDa RNA-binding protein PPTB-1) (Heterogeneous nuclear ribonucleoprotein I) (hnRNP I)                         | PTBP1 PTB                      | Down-regulated |
| O60749 | Sorting nexin-2 (Transformation-related gene 9 protein) (TRG-9)                                                                                                | SNX2 TRG9                      | Down-regulated |

**Table S3.** Full list of differentially expressed proteins in tip vs. pal,  $p < 0.01$  and  $FDR < 0.1$ .

| Entry  | Protein names                                                                                                                                                                                                                                           | Gene names                                  | Protein expression |
|--------|---------------------------------------------------------------------------------------------------------------------------------------------------------------------------------------------------------------------------------------------------------|---------------------------------------------|--------------------|
| O94905 | Erlin-2 (Endoplasmic reticulum lipid raft-associated protein 2) (Stomatin-prohibitin-flotillin-HflC/K domain-containing protein 2) (SPFH domain-containing protein 2)                                                                                   | ERLIN2 C8orf2 SPFH2 UNQ2441/PRO5003/PRO9924 | Up-regulated       |
| P62829 | 60S ribosomal protein L23 (60S ribosomal protein L17) (Large ribosomal subunit protein uL14)                                                                                                                                                            | RPL23                                       | Up-regulated       |
| Q6NYC8 | Phostensin (Protein phosphatase 1 F-actin cytoskeleton-targeting subunit) (Protein phosphatase 1 regulatory subunit 18)                                                                                                                                 | PPP1R18 HKMT1098 KIAA1949                   | Up-regulated       |
| O75340 | Programmed cell death protein 6 (Apoptosis-linked gene 2 protein homolog) (ALG-2)                                                                                                                                                                       | PDCD6 ALG2                                  | Up-regulated       |
| P20290 | Transcription factor BTF3 (Nascent polypeptide-associated complex subunit beta) (NAC-beta) (RNA polymerase B transcription factor 3)                                                                                                                    | BTF3 NACB OK/SW-cl.8                        | Up-regulated       |
| Q9UK76 | Jupiter microtubule associated homolog 1 (Androgen-regulated protein 2) (Hematological and neurological expressed 1 protein) [Cleaved into: Jupiter microtubule associated homolog 1, N-terminally processed]                                           | JPT1 ARM2 HN1                               | Up-regulated       |
| P53992 | Protein transport protein Sec24C (SEC24-related protein C)                                                                                                                                                                                              | SEC24C KIAA0079                             | Up-regulated       |
| P07305 | Histone H1.0 (Histone H1') (Histone H1(0)) [Cleaved into: Histone H1.0, N-terminally processed]                                                                                                                                                         | H1-0 H1F0 H1FV                              | Up-regulated       |
| Q92882 | Osteoclast-stimulating factor 1                                                                                                                                                                                                                         | OSTF1                                       | Up-regulated       |
| P28062 | Proteasome subunit beta type-8 (EC 3.4.25.1) (Low molecular mass protein 7) (Macropain subunit C13) (Multicatalytic endopeptidase complex subunit C13) (Proteasome component C13) (Proteasome subunit beta-5i) (Really interesting new gene 10 protein) | PSMB8 LMP7 PSMB5i RING10 Y2                 | Up-regulated       |
| P27708 | CAD protein [Includes: Glutamine-dependent carbamoyl-phosphate synthase (EC 6.3.5.5); Aspartate carbamoyltransferase (EC 2.1.3.2); Dihydroorotase (EC 3.5.2.3)]                                                                                         | CAD                                         | Up-regulated       |
| Q13561 | Dynactin subunit 2 (50 kDa dynein-associated polypeptide) (Dynactin complex 50 kDa subunit) (DCTN-50) (p50 dynamitin)                                                                                                                                   | DCTN2 DCTN50                                | Up-regulated       |

|        |                                                                                                                                                                                                                      |                         |                |
|--------|----------------------------------------------------------------------------------------------------------------------------------------------------------------------------------------------------------------------|-------------------------|----------------|
| Q9UHB9 | Signal recognition particle subunit SRP68 (SRP68) (Signal recognition particle 68 kDa protein)                                                                                                                       | SRP68                   | Up-regulated   |
| Q99729 | Heterogeneous nuclear ribonucleoprotein A/B (hnRNP A/B) (APOBEC1-binding protein 1) (ABBP-1)                                                                                                                         | HNRNPAB ABBP1 HNRPAB    | Up-regulated   |
| Q16204 | Coiled-coil domain-containing protein 6 (Papillary thyroid carcinoma-encoded protein) (Protein H4)                                                                                                                   | CCDC6 D10S170 TST1      | Up-regulated   |
| P78344 | Eukaryotic translation initiation factor 4 gamma 2 (eIF-4-gamma 2) (eIF-4G 2) (eIF4G 2) (Death-associated protein 5) (DAP-5) (p97)                                                                                   | EIF4G2 DAP5 OK/SW-cl.75 | Up-regulated   |
| Q02750 | Dual specificity mitogen-activated protein kinase kinase 1 (MAP kinase kinase 1) (MAPKK 1) (MKK1) (EC 2.7.12.2) (ERK activator kinase 1) (MAPK/ERK kinase 1) (MEK 1)                                                 | MAP2K1 MEK1 PRKMK1      | Up-regulated   |
| P12955 | Xaa-Pro dipeptidase (X-Pro dipeptidase) (EC 3.4.13.9) (Imidodipeptidase) (Peptidase D) (Proline dipeptidase) (Prolidase)                                                                                             | PEPD PRD                | Down-regulated |
| Q9NX63 | MICOS complex subunit MIC19 (Coiled-coil-helix-coiled-coil-helix domain-containing protein 3)                                                                                                                        | CHCHD3 MIC19 MINOS3     | Down-regulated |
| Q15165 | Serum paraoxonase/arylesterase 2 (PON 2) (EC 3.1.1.2) (EC 3.1.1.81) (Aromatic esterase 2) (A-esterase 2) (Serum arylalkylphosphatase 2)                                                                              | PON2                    | Down-regulated |
| Q9UJU6 | Drebrin-like protein (Cervical SH3P7) (Cervical mucin-associated protein) (Drebrin-F) (HPK1-interacting protein of 55 kDa) (HIP-55) (SH3 domain-containing protein 7)                                                | DBNL CMAP SH3P7 PP5423  | Down-regulated |
| O43294 | Transforming growth factor beta-1-induced transcript 1 protein (Androgen receptor coactivator 55 kDa protein) (Androgen receptor-associated protein of 55 kDa) (Hydrogen peroxide-inducible clone 5 protein) (Hic-5) | TGFB1I1 ARA55           | Down-regulated |
| P21399 | Cytoplasmic aconitate hydratase (Aconitase) (EC 4.2.1.3) (Citrate hydro-lyase) (Ferritin repressor protein) (Iron regulatory protein 1) (IRP1) (Iron-responsive element-binding protein 1) (IRE-BP 1)                | ACO1 IREB1              | Down-regulated |
| Q9NZ01 | Very-long-chain enoyl-CoA reductase (EC 1.3.1.93) (Synaptic glycoprotein SC2) (Trans-2,3-enoyl-CoA reductase) (TER)                                                                                                  | TECR GPSN2 SC2          | Down-regulated |
| P53618 | Coatomer subunit beta (Beta-coat protein) (Beta-COP)                                                                                                                                                                 | COPB1 COPB MSTP026      | Down-regulated |



|        |                                                                                                                                                                                                                                                       |                            |                |
|--------|-------------------------------------------------------------------------------------------------------------------------------------------------------------------------------------------------------------------------------------------------------|----------------------------|----------------|
| O43615 | Mitochondrial import inner membrane translocase subunit TIM44                                                                                                                                                                                         | TIMM44 MIMT44 TIM44        | Down-regulated |
| Q12792 | Twinfilin-1 (Protein A6) (Protein tyrosine kinase 9)                                                                                                                                                                                                  | TWF1 PTK9                  | Down-regulated |
| P14927 | Cytochrome b-c1 complex subunit 7 (Complex III subunit 7) (Complex III subunit VII) (QP-C) (Ubiquinol-cytochrome c reductase complex 14 kDa protein)                                                                                                  | UQCRB UQBP                 | Down-regulated |
| Q9NY33 | Dipeptidyl peptidase 3 (EC 3.4.14.4) (Dipeptidyl aminopeptidase III) (Dipeptidyl arylamidase III) (Dipeptidyl peptidase III) (DPP III) (Enkephalinase B)                                                                                              | DPP3                       | Down-regulated |
| P54578 | Ubiquitin carboxyl-terminal hydrolase 14 (EC 3.4.19.12) (Deubiquitinating enzyme 14) (Ubiquitin thioesterase 14) (Ubiquitin-specific-processing protease 14)                                                                                          | USP14 TGT                  | Down-regulated |
| Q9NTK5 | Obg-like ATPase 1 (DNA damage-regulated overexpressed in cancer 45) (DOC45) (GTP-binding protein 9)                                                                                                                                                   | OLA1 GTPBP9 PRO2455 PTD004 | Down-regulated |
| Q9H0U4 | Ras-related protein Rab-1B                                                                                                                                                                                                                            | RAB1B                      | Down-regulated |
| P42167 | Lamina-associated polypeptide 2, isoforms beta/gamma (Thymopoietin, isoforms beta/gamma) (TP beta/gamma) (Thymopoietin-related peptide isoforms beta/gamma) (TPRP isoforms beta/gamma) [Cleaved into: Thymopoietin (TP) (Splenin); Thymopentin (TP5)] | TMPO LAP2                  | Down-regulated |
| P10253 | Lysosomal alpha-glucosidase (EC 3.2.1.20) (Acid maltase) (Aglucosidase alfa) [Cleaved into: 76 kDa lysosomal alpha-glucosidase; 70 kDa lysosomal alpha-glucosidase]                                                                                   | GAA                        | Down-regulated |
| O95336 | 6-phosphogluconolactonase (6PGL) (EC 3.1.1.31)                                                                                                                                                                                                        | PGLS                       | Down-regulated |
| P52597 | Heterogeneous nuclear ribonucleoprotein F (hnRNP F) (Nucleolin-like protein mcs94-1) [Cleaved into: Heterogeneous nuclear ribonucleoprotein F, N-terminally processed]                                                                                | HNRNPF HNRPF               | Down-regulated |
| O76094 | Signal recognition particle subunit SRP72 (SRP72) (Signal recognition particle 72 kDa protein)                                                                                                                                                        | SRP72                      | Down-regulated |
| Q5JPE7 | Nodal modulator 2 (pM5 protein 2)                                                                                                                                                                                                                     | NOMO2                      | Down-regulated |
| P83916 | Chromobox protein homolog 1 (HP1Hsbeta) (Heterochromatin protein 1 homolog beta) (HP1                                                                                                                                                                 | CBX1 CBX                   | Down-regulated |

|        |                                                                                                                                                                           |                     |                |
|--------|---------------------------------------------------------------------------------------------------------------------------------------------------------------------------|---------------------|----------------|
|        | beta) (Heterochromatin protein p25) (M31) (Modifier 1 protein) (p25beta)                                                                                                  |                     |                |
| O00231 | 26S proteasome non-ATPase regulatory subunit 11 (26S proteasome regulatory subunit RPN6) (26S proteasome regulatory subunit S9) (26S proteasome regulatory subunit p44.5) | PSMD11              | Down-regulated |
| Q15046 | Lysine--tRNA ligase (EC 2.7.7.-) (EC 6.1.1.6) (Lysyl-tRNA synthetase) (LysRS)                                                                                             | KARS1 KARS KIAA0070 | Down-regulated |
| O43795 | Unconventional myosin-Ib (MYH-1c) (Myosin I alpha) (MMI-alpha) (MMIa)                                                                                                     | MYO1B               | Down-regulated |
| Q9BZL1 | Ubiquitin-like protein 5                                                                                                                                                  | UBL5                | Down-regulated |
| Q16775 | Hydroxyacylglutathione hydrolase, mitochondrial (EC 3.1.2.6) (Glyoxalase II) (Glx II)                                                                                     | HAGH GLO2 HAGH1     | Down-regulated |
| P52943 | Cysteine-rich protein 2 (CRP-2) (Protein ESP1)                                                                                                                            | CRIP2 CRP2          | Down-regulated |

**Table S4.** Full list of proteins that were unique in pal vs. veh,  $p < 0.01$  and  $FDR < 0.1$ .

| Entry  | Protein names                                                                                                                                                                                                                                                                                            | Gene names                                    | Protein expression |
|--------|----------------------------------------------------------------------------------------------------------------------------------------------------------------------------------------------------------------------------------------------------------------------------------------------------------|-----------------------------------------------|--------------------|
| P31949 | Protein S100-A11 (Calgizzarin) (Metastatic lymph node gene 70 protein) (MLN 70) (Protein S100-C) (S100 calcium-binding protein A11) [Cleaved into: Protein S100-A11, N-terminally processed]                                                                                                             | S100A11<br>MLN70<br>S100C                     | Up-regulated       |
| Q9P2R7 | Succinate--CoA ligase [ADP-forming] subunit beta, mitochondrial (EC 6.2.1.5) (ATP-specific succinyl-CoA synthetase subunit beta) (A-SCS) (Succinyl-CoA synthetase beta-A chain) (SCS-betaA)                                                                                                              | SUCLA2                                        | Up-regulated       |
| Q9Y265 | RuvB-like 1 (EC 3.6.4.12) (49 kDa TATA box-binding protein-interacting protein) (49 kDa TBP-interacting protein) (54 kDa erythrocyte cytosolic protein) (ECP-54) (INO80 complex subunit H) (Nuclear matrix protein 238) (NMP 238) (Pontin 52) (TIP49a) (TIP60-associated protein 54-alpha) (TAP54-alpha) | RUVBL1<br>INO80H<br>NMP238<br>TIP49<br>TIP49A | Up-regulated       |
| P61204 | ADP-ribosylation factor 3                                                                                                                                                                                                                                                                                | ARF3                                          | Up-regulated       |
| Q8NGA1 | Olfactory receptor 1M1 (Olfactory receptor 19-6) (OR19-6) (Olfactory receptor OR19-5)                                                                                                                                                                                                                    | OR1M1                                         | Up-regulated       |
| P81605 | Dermcidin (EC 3.4.-.-) (Preproteolysin) [Cleaved into: Survival-promoting peptide; DCD-1]                                                                                                                                                                                                                | DCD AIDD<br>DSEP                              | Up-regulated       |
| P13473 | Lysosome-associated membrane glycoprotein 2 (LAMP-2) (Lysosome-associated membrane protein 2) (CD107 antigen-like family member B) (LGP-96) (CD antigen CD107b)                                                                                                                                          | LAMP2                                         | Up-regulated       |
| Q6P2Q9 | Pre-mRNA-processing-splicing factor 8 (220 kDa U5 snRNP-specific protein) (PRP8 homolog) (Splicing factor Prp8) (p220)                                                                                                                                                                                   | PRPF8<br>PRPC8                                | Up-regulated       |
| P46109 | Crk-like protein                                                                                                                                                                                                                                                                                         | CRKL                                          | Up-regulated       |
| P49821 | NADH dehydrogenase [ubiquinone] flavoprotein 1, mitochondrial (EC 7.1.1.2) (Complex I-51kD) (CI-51kD) (NADH dehydrogenase flavoprotein 1) (NADH-ubiquinone oxidoreductase 51 kDa subunit)                                                                                                                | NDUFV1<br>UQOR1                               | Up-regulated       |
| Q9NZ01 | Very-long-chain enoyl-CoA reductase (EC 1.3.1.93) (Synaptic glycoprotein SC2) (Trans-2,3-enoyl-CoA reductase) (TER)                                                                                                                                                                                      | TECR<br>GPSN2 SC2                             | Up-regulated       |
| Q9UJU6 | Drebrin-like protein (Cervical SH3P7) (Cervical mucin-associated protein) (Drebrin-F) (HPK1-interacting protein of 55 kDa) (HIP-55) (SH3 domain-containing protein 7)                                                                                                                                    | DBNL CMAP<br>SH3P7<br>PP5423                  | Up-regulated       |
| P12955 | Xaa-Pro dipeptidase (X-Pro dipeptidase) (EC 3.4.13.9) (Imidodipeptidase) (Peptidase D) (Proline dipeptidase) (Prolidase)                                                                                                                                                                                 | PEPD PRD                                      | Up-regulated       |
| P78344 | Eukaryotic translation initiation factor 4 gamma 2 (eIF-4-gamma 2) (eIF-4G 2) (eIF4G 2) (Death-associated protein 5) (DAP-5) (p97)                                                                                                                                                                       | EIF4G2<br>DAP5<br>OK/SW-cl.75                 | Down-regulated     |
| Q16204 | Coiled-coil domain-containing protein 6 (Papillary thyroid carcinoma-encoded protein) (Protein H4)                                                                                                                                                                                                       | CCDC6<br>D10S170<br>TST1                      | Down-regulated     |
| Q13561 | Dynactin subunit 2 (50 kDa dynein-associated polypeptide) (Dynactin complex 50 kDa subunit) (DCTN-50) (p50 dynamitin)                                                                                                                                                                                    | DCTN2<br>DCTN50                               | Down-regulated     |
| Q9NPA8 | Transcription and mRNA export factor ENY2 (Enhancer of yellow 2 transcription factor homolog)                                                                                                                                                                                                            | ENY2 DC6                                      | Down-regulated     |
| P61927 | 60S ribosomal protein L37 (G1.16) (Large ribosomal subunit protein eL37)                                                                                                                                                                                                                                 | RPL37                                         | Down-regulated     |

|        |                                                                                                                                       |                                 |                |
|--------|---------------------------------------------------------------------------------------------------------------------------------------|---------------------------------|----------------|
| O95373 | Importin-7 (Imp7) (Ran-binding protein 7) (RanBP7)                                                                                    | IPO7<br>RANBP7                  | Down-regulated |
| P84090 | Enhancer of rudimentary homolog                                                                                                       | ERH                             | Down-regulated |
| Q6NYC8 | Phostensin (Protein phosphatase 1 F-actin cytoskeleton-targeting subunit) (Protein phosphatase 1 regulatory subunit 18)               | PPP1R18<br>HKMT1098<br>KIAA1949 | Down-regulated |
| Q9UHV9 | Prefoldin subunit 2                                                                                                                   | PFDN2 PFD2<br>HSPC231           | Down-regulated |
| P53621 | Coatamer subunit alpha (Alpha-coat protein) (Alpha-COP) (HEP-COP) (HEPCOP) [Cleaved into: Xenin (Xenopsin-related peptide); Proxenin] | COPA                            | Down-regulated |

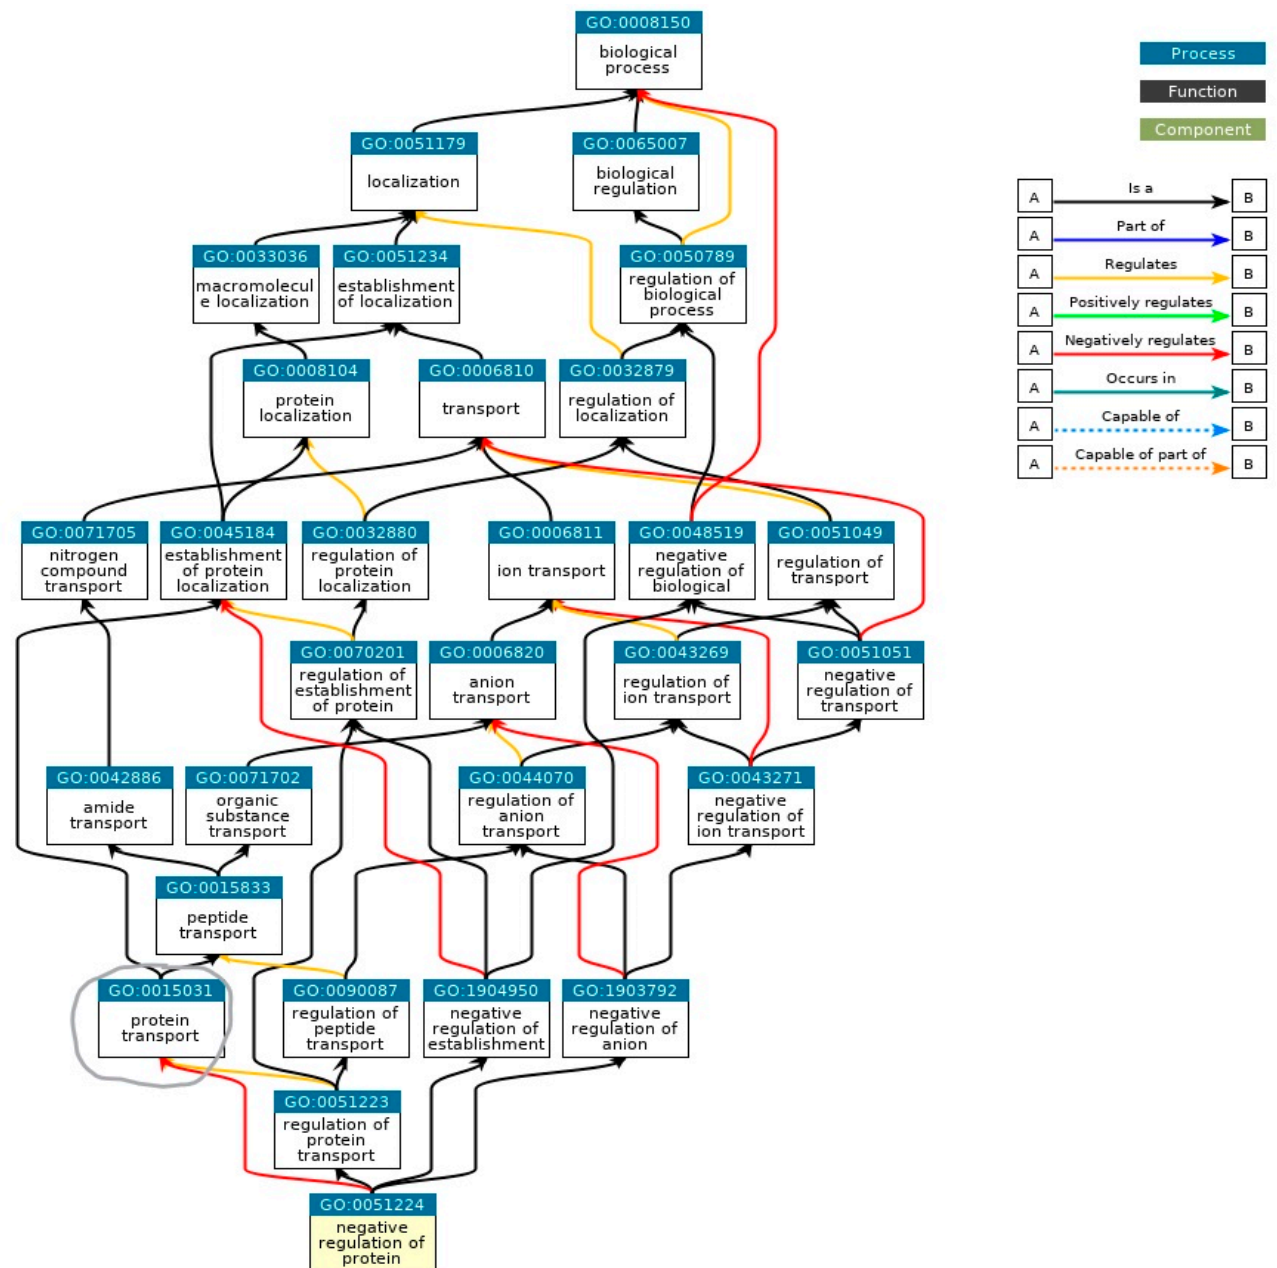

QuickGO - <https://www.ebi.ac.uk/QuickGO>

**Figure S2.** GO Slim of the regulation of protein transport

**Table S5.** Full list of nodes that passed the filter imposed by the MCODE algorithm in Cytoscape 3.8.0, representing the hub proteins obtained in this study, positively and significantly correlated to changes induced by treatment.

| Mcode Cluster | From node | Gene names                                                 | Belonging module | Node name | To node |
|---------------|-----------|------------------------------------------------------------|------------------|-----------|---------|
| 12            | O75340    | PDCD6 ALG2                                                 | turquoise        | O75340    | O75340  |
| 12            | P51571    | SSR4 TRAPD                                                 | turquoise        | P51571    | P51571  |
| 12            | P13861    | PRKAR2A PKR2<br>PRKAR2                                     | turquoise        | P13861    |         |
| 11            | Q9NY33    | DPP3                                                       | turquoise        | Q9NY33    | Q9NY33  |
| 11            | O43294    | TGFB1I1 ARA55                                              | turquoise        | O43294    |         |
| 13            |           | PLCH1 KIAA1069<br>PLCL3                                    | red              | Q4KWH8    | Q4KWH8  |
| 13            | Q9BZK7    | TBL1XR1 IRA1<br>TBLR1                                      | red              | Q9BZK7    | Q9BZK7  |
| 13            | P49023    | PXN                                                        | red              | P49023    |         |
| 4             |           | ALS2 ALS2CR6<br>KIAA1563                                   | red              | Q96Q42    | Q96Q42  |
| 6             | P55263    | ADK                                                        | red              | P55263    | P55263  |
| 6             | O95373    | IPO7 RANBP7                                                | red              | O95373    | O95373  |
| 14            | P61313    | RPL15 EC45<br>TCBAP0781                                    | red              | P61313    | P61313  |
| 14            | P47755    | CAPZA2                                                     | red              | P47755    |         |
| 4             | O60884    | DNAJA2 CPR3<br>HIRIP4                                      | red              | O60884    | O60884  |
| 5             |           | CHCHD3 MIC19<br>MINOS3                                     | turquoise        | Q9NX63    | Q9NX63  |
| 5             | P10253    | GAA                                                        | turquoise        | P10253    | P10253  |
| 11            | Q9NTK5    | OLA1 GTPBP9<br>PRO2455 PTD004                              | turquoise        | Q9NTK5    | Q9NTK5  |
| 8             |           | EIF3L EIF3EIP<br>EIF3S6IP<br>HSPC021<br>HSPC025<br>MSTP005 | turquoise        | Q9Y262    | Q9Y262  |
| 8             | P84157    | MXRA7                                                      | turquoise        | P84157    | P84157  |
| 8             | P13611    | VCAN CSPG2                                                 | turquoise        | P13611    | P13611  |
| 8             | P09960    | LTA4H LTA4                                                 | turquoise        | P09960    |         |
| 4             | P16035    | TIMP2                                                      | red              | P16035    | P16035  |

|    |        |                             |           |        |        |
|----|--------|-----------------------------|-----------|--------|--------|
| 6  | P61204 | ARF3                        | red       | P61204 | P61204 |
| 14 | O43795 | MYO1B                       | red       | O43795 | O43795 |
| 5  | Q12792 | TWF1 PTK9                   | turquoise | Q12792 | Q12792 |
| 5  | P21399 | ACO1 IREB1                  | turquoise | P21399 | P21399 |
| 4  | P60484 | PTEN MMAC1<br>TEP1          | red       | P60484 | P60484 |
| 6  | Q92890 | UFD1 UFD1L                  | red       | Q92890 | Q92890 |
| 6  |        | STUB1 CHIP<br>PP1131        | red       | Q9UNE7 | Q9UNE7 |
| 2  | P63173 | RPL38                       | pink      | P63173 | P63173 |
| 2  | Q9BR76 | CORO1B                      | pink      | Q9BR76 | Q9BR76 |
| 4  | O00571 | DDX3X DBX<br>DDX3           | red       | O00571 | O00571 |
| 2  | P08708 | RPS17 RPS17L                | pink      | P08708 | P08708 |
| 2  | P37837 | TALDO1 TAL<br>TALDO TALDOR  | pink      | P37837 | P37837 |
| 2  | P49773 | HINT1 HINT<br>PKC11 PRKCNH1 | pink      | P49773 | P49773 |
| 2  | P23396 | RPS3 OK/SW-<br>cl.26        | pink      | P23396 | P23396 |
| 2  | P23381 | WARS1 IFI53<br>WARS WRS     | pink      | P23381 | P23381 |
| 2  | P30086 | PEBP1 PBP PEBP              | pink      | P30086 | P30086 |
| 2  | P07951 | TPM2 TMSB                   | pink      | P07951 | P07951 |
| 2  | P26038 | MSN                         | pink      | P26038 | P26038 |
| 2  | P13639 | EEF2 EF2                    | pink      | P13639 | P13639 |
| 1  |        | ART4 DO DOK1                | turquoise | Q93070 | Q93070 |
| 1  | O95819 | MAP4K4 HGK<br>KIAA0687 NIK  | turquoise | O95819 | O95819 |
| 10 |        | PFDN1 PFD1                  | turquoise | O60925 | O60925 |
| 1  | P49902 | NT5C2 NT5B<br>NT5CP PNT5    | turquoise | P49902 | P49902 |
| 1  | P18065 | IGFBP2 BP2 IBP2             | turquoise | P18065 | P18065 |
| 1  | Q7L014 | DDX46 KIAA0801              | turquoise | Q7L014 | Q7L014 |
| 7  | P36507 | MAP2K2 MEK2<br>MKK2 PRKMK2  | pink      | P36507 | P36507 |
| 3  | Q9Y646 | CPQ LCH1 PGCP               | pink      | Q9Y646 | Q9Y646 |
| 1  | O95497 | VNN1                        | turquoise | O95497 | O95497 |

|    |        |                                                  |           |        |        |
|----|--------|--------------------------------------------------|-----------|--------|--------|
| 7  | Q6IBS0 | TWF2 PTK9L<br>MSTP011                            | turquoise | Q6IBS0 | Q6IBS0 |
| 1  | P05413 | FABP3 FABP11<br>MDGI                             | turquoise | P05413 | P05413 |
| 1  | P62244 | RPS15A OK/SW-<br>cl.82                           | turquoise | P62244 | P62244 |
| 1  | Q9P0K7 | RAI14 KIAA1334<br>NORPEG                         | turquoise | Q9P0K7 | Q9P0K7 |
| 1  | Q9NVD7 | PARVA MXRA2                                      | turquoise | Q9NVD7 | Q9NVD7 |
| 1  | P53985 | SLC16A1 MCT1                                     | turquoise | P53985 | P53985 |
| 1  | P32969 | RPL9 OK/SW-<br>cl.103; RPL9P7;<br>RPL9P8; RPL9P9 | turquoise | P32969 | P32969 |
| 7  | P05121 | SERPINE1 PAI1<br>PLANH1                          | red       | P05121 | P05121 |
| 1  | P30040 | ERP29 C12orf8<br>ERP28                           | turquoise | P30040 | P30040 |
| 1  | P49327 | FASN FAS                                         | turquoise | P49327 | P49327 |
| 1  | O00231 | PSMD11                                           | turquoise | O00231 | O00231 |
| 1  | P39687 | ANP32A C15orf1<br>LANP MAPM<br>PHAP1             | turquoise | P39687 | P39687 |
| 1  | B5ME19 | EIF3CL                                           | turquoise | B5ME19 | B5ME19 |
| 2  | P27635 | RPL10 DXS648E<br>QM                              | turquoise | P27635 | P27635 |
| 10 | Q07666 | KHDRBS1 SAM68                                    | turquoise | Q07666 | Q07666 |
| 2  | P49257 | LMAN1 ERGIC53<br>F5F8D                           | turquoise | P49257 | P49257 |
| 1  | P62195 | PSMC5 SUG1                                       | turquoise | P62195 | P62195 |
| 2  | O00159 | MYO1C                                            | turquoise | O00159 | O00159 |
| 1  | P12235 | SLC25A4 ANT1                                     | turquoise | P12235 | P12235 |
| 1  | P24821 | TNC HXB                                          | turquoise | P24821 | P24821 |
| 1  | P11766 | ADH5 ADHX FDH                                    | turquoise | P11766 | P11766 |
| 7  | Q04637 | EIF4G1 EIF4F<br>EIF4G EIF4GI                     | turquoise | Q04637 | Q04637 |
| 1  | Q92499 | DDX1                                             | turquoise | Q92499 | Q92499 |
| 10 | P15559 | NQO1 DIA4<br>NMOR1                               | turquoise | P15559 | P15559 |



|   |        |                                   |           |        |        |
|---|--------|-----------------------------------|-----------|--------|--------|
| 1 | O14974 | PPP1R12A MBS<br>MYPT1             | turquoise | O14974 | O14974 |
| 1 | P07737 | PFN1                              | turquoise | P07737 | P07737 |
| 2 | Q16527 | CSRP2 LMO5<br>SMLIM               | turquoise | Q16527 | Q16527 |
| 1 | Q14247 | CTTN EMS1                         | turquoise | Q14247 | Q14247 |
| 1 | P29692 | EEF1D EF1D                        | turquoise | P29692 | P29692 |
| 7 | Q9Y617 | PSAT1 PSA                         | pink      | Q9Y617 | Q9Y617 |
| 9 | Q00341 | HDLBP HBP VGL                     | turquoise | Q00341 | Q00341 |
| 9 | P14136 | GFAP                              | turquoise | P14136 | P14136 |
| 2 | Q99497 | PARK7                             | turquoise | Q99497 | Q99497 |
| 1 | P27348 | YWHAQ                             | turquoise | P27348 | P27348 |
| 1 | P23528 | CFL1 CFL                          | turquoise | P23528 | P23528 |
| 1 | Q06830 | PRDX1 PAGA<br>PAGB TDPX2          | turquoise | Q06830 | Q06830 |
| 1 | P62258 | YWHAЕ                             | turquoise | P62258 | P62258 |
| 3 | P50395 | GDI2 RABGDIB                      | turquoise | P50395 | P50395 |
| 1 | P07195 | LDHB                              | turquoise | P07195 | P07195 |
| 3 | P13667 | PDIA4 ERP70<br>ERP72              | turquoise | P13667 | P13667 |
| 1 | P55072 | VCP                               | turquoise | P55072 | P55072 |
| 1 | O75083 | WDR1                              | turquoise | O75083 | O75083 |
| 1 | P68104 | EEF1A1 EEF1A<br>EF1A LENG7        | turquoise | P68104 | P68104 |
| 9 | P63104 | YWHAZ                             | turquoise | P63104 | P63104 |
| 3 | P30101 | PDIA3 ERP57<br>ERP60 GRP58        | turquoise | P30101 | P30101 |
| 2 | Q14195 | DPYSL3 CRMP4<br>DRP3 ULIP ULIP1   | turquoise | Q14195 | Q14195 |
| 1 | Q13509 | TUBB3 TUBB4                       | turquoise | Q13509 | Q13509 |
| 1 | P07900 | HSP90AA1<br>HSP90A HSPC1<br>HSPCA | turquoise | P07900 | P07900 |
| 7 | P14625 | HSP90B1 GRP94<br>TRA1             | turquoise | P14625 | P14625 |
| 1 | P07437 | TUBB TUBB5<br>OK/SW-cl.56         | turquoise | P07437 | P07437 |
| 1 | Q71U36 | TUBA1A TUBA3                      | turquoise | Q71U36 | Q71U36 |
| 1 | P63261 | ACTG1 ACTG                        | turquoise | P63261 |        |

|   |        |                                        |           |        |        |
|---|--------|----------------------------------------|-----------|--------|--------|
| 3 | P09913 | IFIT2 CIG-42<br>G10P2 IFI54<br>ISG54   | turquoise | P09913 | P09913 |
| 7 | Q9UBI6 | GNG12                                  | turquoise | Q9UBI6 | Q9UBI6 |
| 3 | O14879 | IFIT3 CIG-49<br>IFI60 IFIT4 ISG60      | turquoise | O14879 | O14879 |
| 1 | P09211 | GSTP1 FAEES3<br>GST3                   | turquoise | P09211 | P09211 |
| 1 | O14950 | MYL12B MRLC2<br>MYLC2B                 | turquoise | O14950 | O14950 |
| 7 | P11021 | HSPA5 GRP78                            | turquoise | P11021 | P11021 |
| 3 | P04406 | GAPDH GAPD<br>CDABP0047<br>OK/SW-cl.12 | turquoise | P04406 | P04406 |
| 1 | P11142 | HSPA8 HSC70<br>HSP73 HSPA10            | turquoise | P11142 | P11142 |
